# Supplementary material
Source: PubMed Central journal article supplement (PMC7856548)
Supplement: jama-e2026345-s003.pdf [file jama-e2026345-s003.pdf]

## List of Investigators

| Investigation Site                                                                                                                                                 | Investigators                                                                                                                                                                                                              |
|--------------------------------------------------------------------------------------------------------------------------------------------------------------------|----------------------------------------------------------------------------------------------------------------------------------------------------------------------------------------------------------------------------|
| Charité Campus Benjamin Franklin<br>Charité Campus Mitte<br>Charité Campus Virchow-Klinikum                                                                        | Farnoush Alborzi, Josef Baumann, Cornelia Buchholz, Jacqueline Freier, Katrin Hayens, Annegret Hille, Marianne Muller, Lisa Ratzer, Susanne Schenk, Ira Napierkowski<br>( <i>Supervising Clinical Research Associate</i> ) |
| DRK Klinikum Berlin Köpenick                                                                                                                                       | Josef Baumann, Cornelia Buchholz, Katrin Hayens, Lisa Ratzer, Susanne Schenk, Katrin Hayens, Ira Napierkowski<br>( <i>Supervising Clinical Research Associate</i> )                                                        |
| Evangelisches Krankenhaus Königin Elisabeth Herzberge                                                                                                              | Josef Baumann, Cornelia Buchholz, Katrin Hayens, Lisa Ratzer, Ira Napierkowski<br>( <i>Supervising Clinical Research Associate</i> )                                                                                       |
| Helios-Klinikum Berlin Buch                                                                                                                                        | Farnoush Alborzi, Annegret Hille, Marianne Muller, Ira Napierkowski<br>( <i>Supervising Clinical Research Associate</i> )                                                                                                  |
| Jüdisches Krankenhaus Berlin                                                                                                                                       | Josef Baumann                                                                                                                                                                                                              |
| Park-Klinik Weißensee                                                                                                                                              | Josef Baumann, Annegret Hille, Marianne Muller, Ira Napierkowski<br>( <i>Supervising Clinical Research Associate</i> )                                                                                                     |
| Schlosspark Klinik Charlottenburg                                                                                                                                  | Josef Baumann, Annegret Hille, Lisa Ratzer, Ira Napierkowski<br>( <i>Supervising Clinical Research Associate</i> )                                                                                                         |
| Unfallkrankenhaus Berlin                                                                                                                                           | Farnoush Alborzi, Annegret Hille, Marianne Muller, Susanne Schenk, Ira Napierkowski<br>( <i>Supervising Clinical Research Associate</i> )                                                                                  |
| Vivantes Auguste-Viktoria-Klinikum<br>Vivantes Humboldt-Klinikum<br>Vivantes Klinikum im Friedrichshain<br>Vivantes Klinikum Neukölln<br>Vivantes Klinikum Spandau | Josef Baumann, Jacqueline Freier, Annegret Hille, Susanne Schenk, Ira Napierkowski<br>( <i>Supervising Clinical Research Associate</i> )                                                                                   |
| Berliner Feuerwehr<br><br>Paris Diderot University, Paris, France<br>University of Glasgow, Glasgow, UK<br>Harvard Medical School, Boston, USA                     | Farnoush Alborzi, Josef Baumann, Annegret Hille<br><br>Marie-Germaine Bousser<br>Kennedy R. Lees<br>Lee H. Schwamm<br><br>(Members of the Data Safety Monitoring Board)                                                    |
